# Supplementary material for: Matriglycan maintains t-tubule structural integrity in cardiac muscle
Source: PubMed Central journal article supplement (PMC11145246; doi:10.1073/pnas.2402890121), 2024-05-21
Supplement: pnas.2402890121.sapp.pdf [file pnas.2402890121.sapp.pdf]

## **Supporting Information for**

### **Matriglycan maintains t-tubule structural integrity in cardiac muscle**

Jeffrey M. Hord<sup>1</sup>, Mary E. Anderson<sup>1</sup>, Sally J. Prouty<sup>1</sup>, Shelly Melton<sup>1</sup>, Zeita Gastel<sup>1</sup>,  
Kathy Zimmerman<sup>3</sup>, Robert M. Weiss<sup>2, 3, 4</sup>, Kevin P. Campbell<sup>1\*</sup>

Kevin P. Campbell

Email: [kevin-campbell@uiowa.edu](mailto:kevin-campbell@uiowa.edu)

#### **This PDF file includes:**

Figures S1 to S14

**A.**

**Cardiac Muscle**

Lipid Membrane Marker

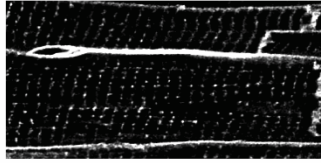

Basement Membrane Marker

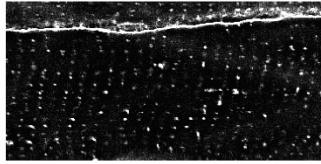

10  $\mu$ m

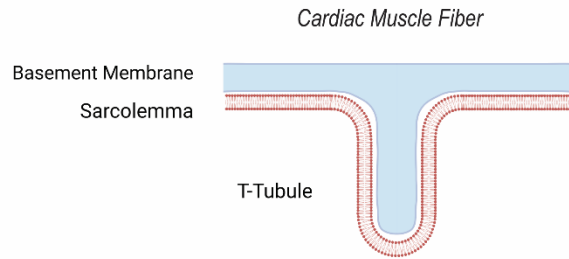

**B.**

**Skeletal Muscle**

Lipid Membrane Marker

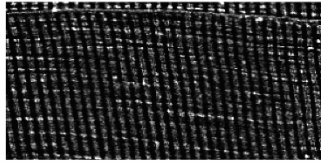

Basement Membrane Marker

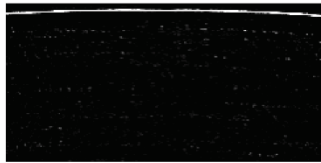

10  $\mu$ m

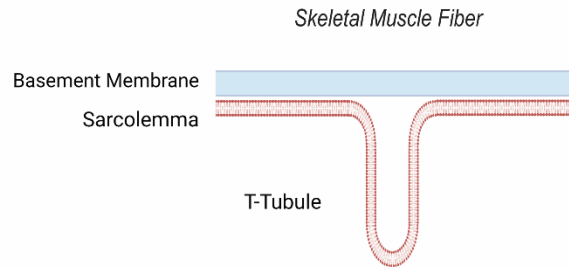

**Fig. S1. The presence of basement membrane within the t-tubule lumen is specific to cardiac muscle fibers. A-B** Fluorescent labeling of myofiber lipid membranes with FM464-FX and basement membranes with WGA-AlexaFluor488 on cardiac ventricular myofibers **A**, and extensor digitorum longus (EDL) skeletal muscle fibers **B**, from control mice. 120x magnification; Scale bar = 20  $\mu$ m. Illustrations depict the differences between t-tubules in cardiac muscle and skeletal muscle. The lumen of cardiac muscle t-tubules contains extracellular basement membrane and generally has a greater width compared to that of skeletal muscle t-tubules.

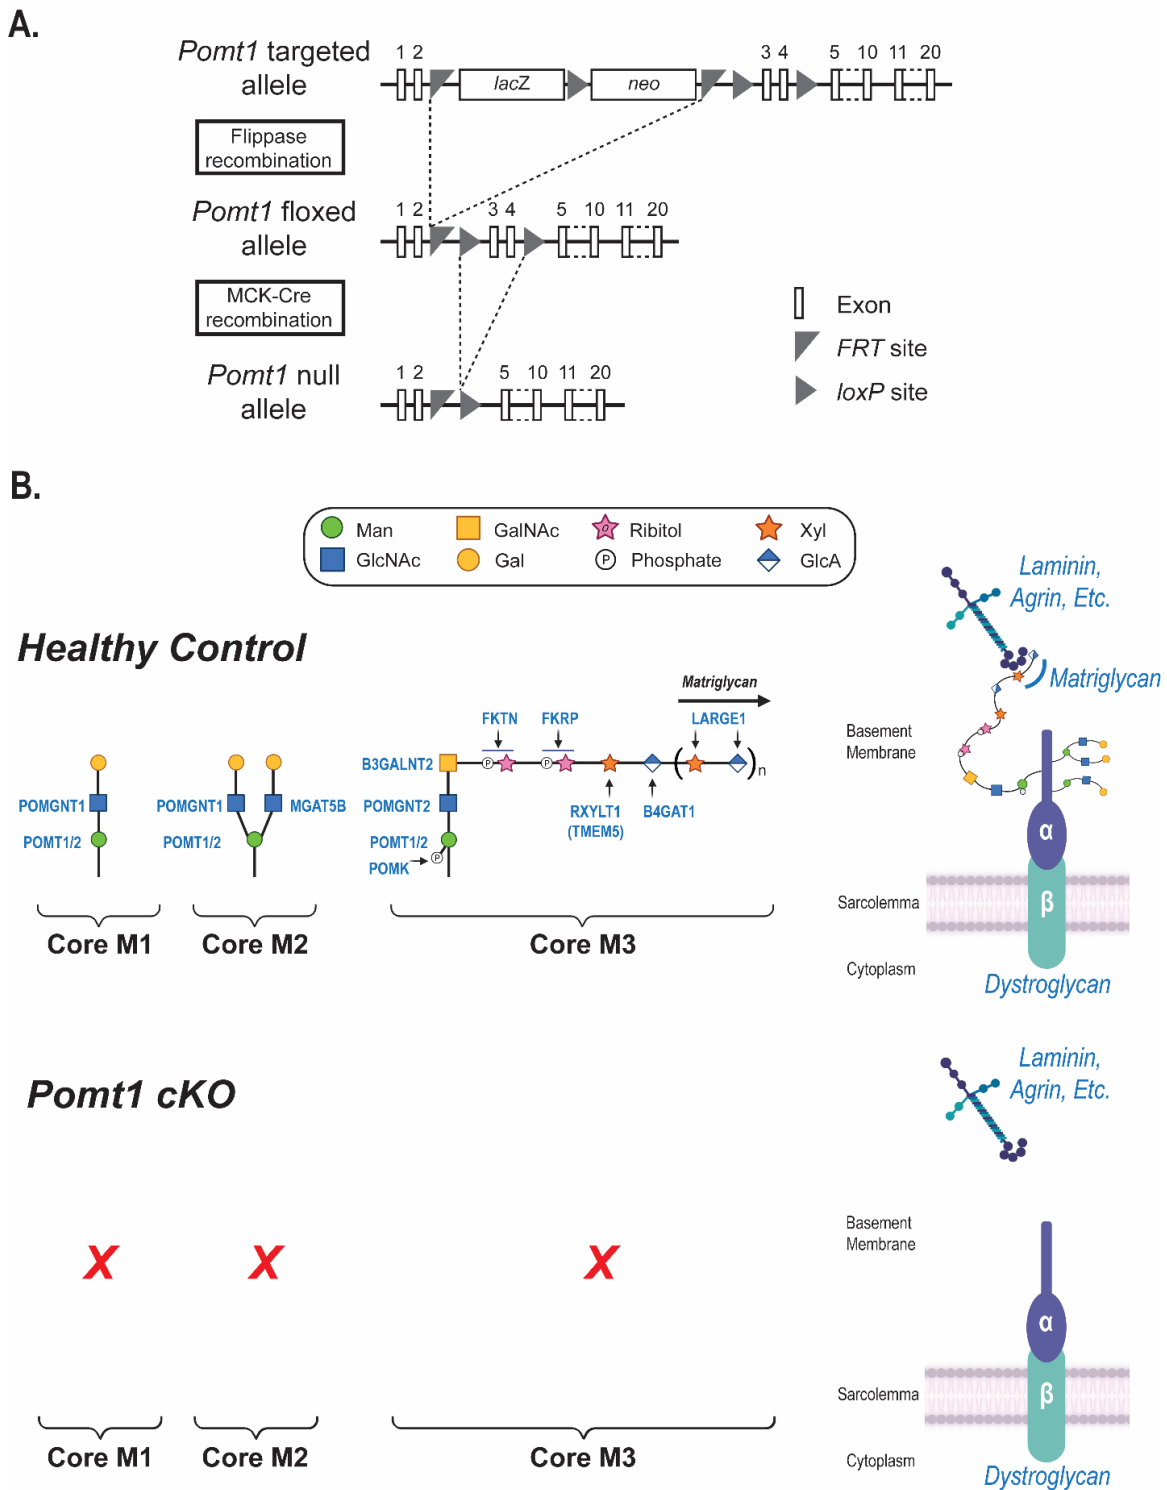

**Fig. S2. Generation of the MCK-Cre / floxed *Pomt1* mouse line.** **A**, Design of the floxed *Pomt1* mouse line crossed with Cre under the MCK promoter. **B**, Comparison of core M1, M2, and M3 biosynthesis in healthy control mice and *Pomt1* cKO mice. Panels on the right illustrate sarcolemma-localized dystroglycan and its interaction with ECM ligands. Abbreviations: Man, mannose; GlcNAc, *N*-acetyl-glucosamine; Gal, galactose; GalNAc, *N*-acetyl-galactosamine; Xyl, xylose; GlcA, glucuronic acid; POMT1/2, protein O-mannosyltransferases 1 and 2; POMGNT1, protein O-linked mannose *N*-acetyl-glucosaminyltransferase 1; POMGNT2, protein O-linked mannose *N*-acetyl-glucosaminyltransferase 2; MGAT5B, mannosyl  $\alpha$ 1,6-glycoprotein  $\beta$ 1,6-*N*-

acetyl-glucosaminyltransferase; POMGNT2, protein O-linked mannose *N*-acetyl-glucosaminyltransferase 2; B3GALNT2,  $\beta$ 1,3-*N*-acetylgalactosaminyltransferase 2; POMK, protein O-mannose kinase; FKTN, Fukutin; FKRP, Fukutin related protein; RXYLT1, ribitol xylosyltransferase 1; TMEM5, transmembrane protein 5; B4GAT1,  $\beta$ 1,4-glucuronyltransferase 1; LARGE1, like-acetyl-glucosaminyltransferase 1.

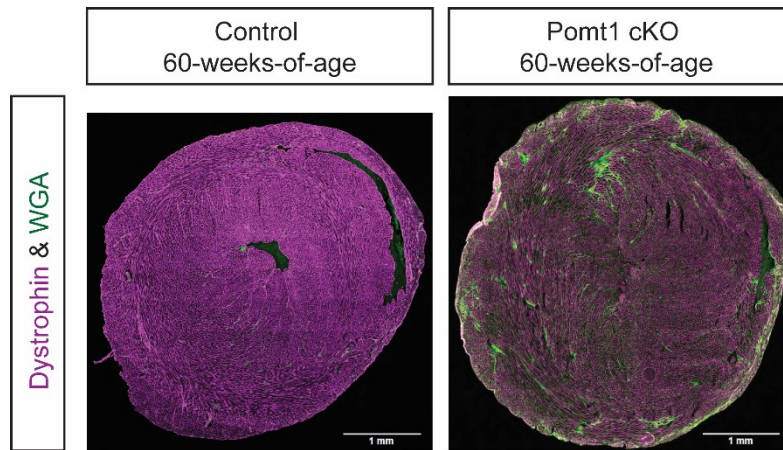

**Fig. S3. Immunofluorescence on left ventricular cross-sections of 60-week-old control and Pomt1 cKO mice. Scale bar = 1 mm.**

**A.**

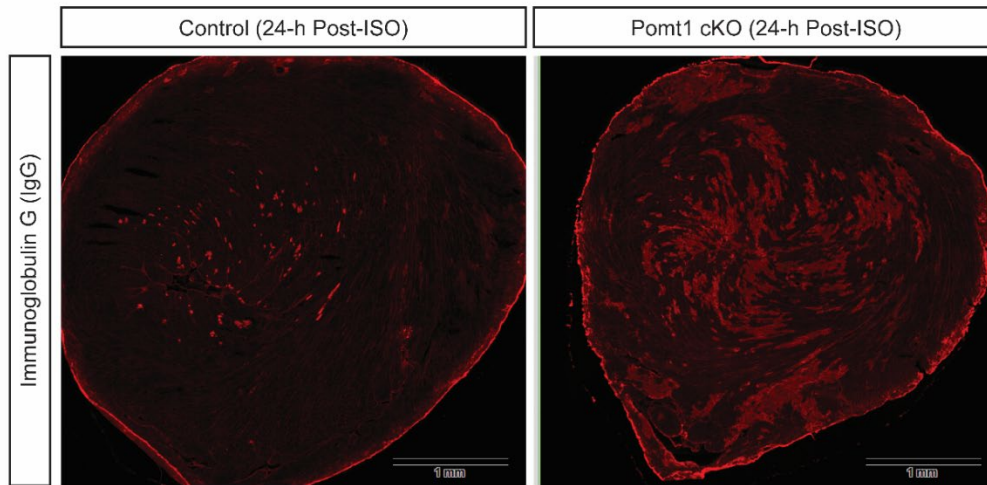

**B.**

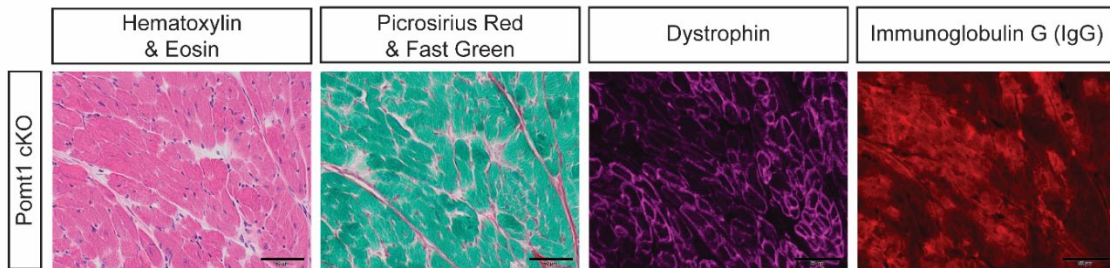

**Fig. S4. Isoproterenol-induced stress causes injury to cardiomyocytes from Pomt1 cKO mice.** Sixteen- to 36-week-old control and Pomt1 cKO mice received intraperitoneal (i.p.) injection of isoproterenol (ISO; 10 mg/kg body weight). **A**, Immunofluorescence of hearts from control or Pomt1 cKO mice 24-h after injection. Scale bar = 1 mm. **B**, Histological analysis of muscle from the cardiac ventricle isolated from Pomt1 cKO mice 24-h post-ISO injection. Cryosections are stained with Hematoxylin and Eosin, Picrosirius red and Fast Green, anti-dystrophin, and Immunoglobulin G (IgG). Scale bar = 50  $\mu$ m.

**A.**

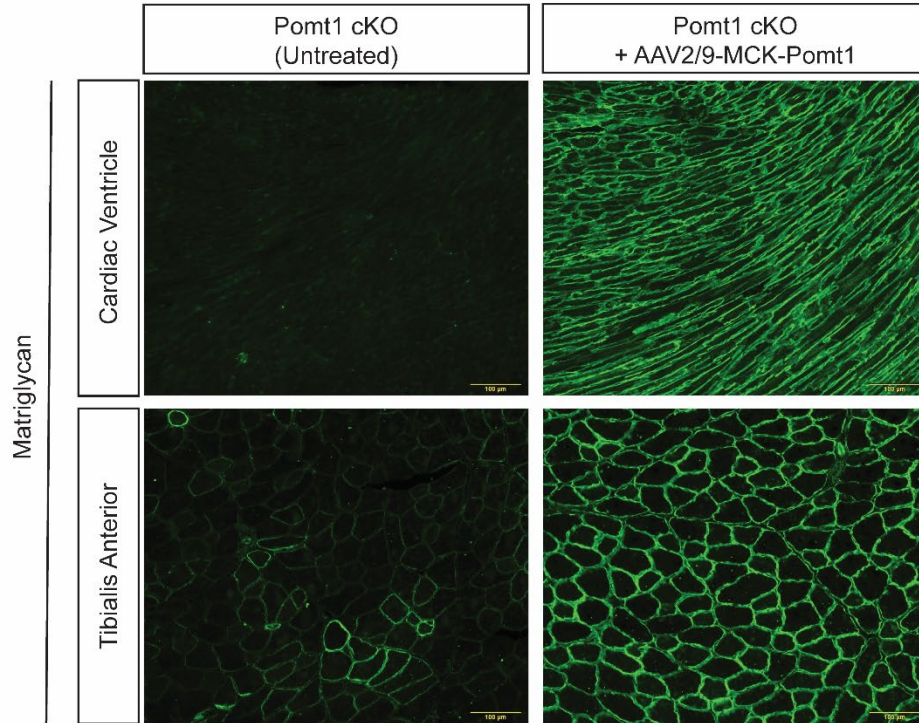

**B.**

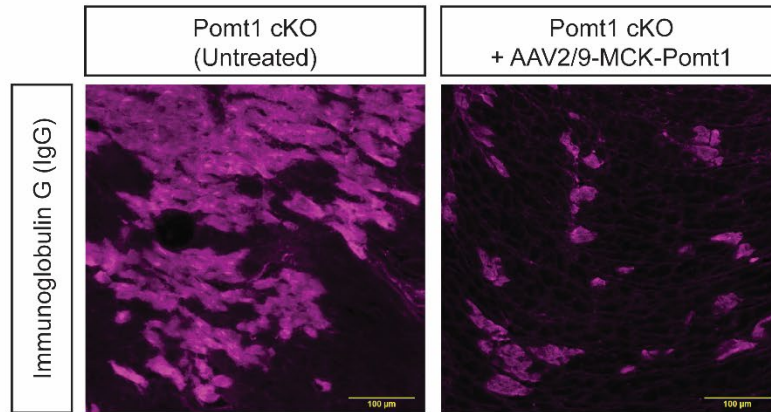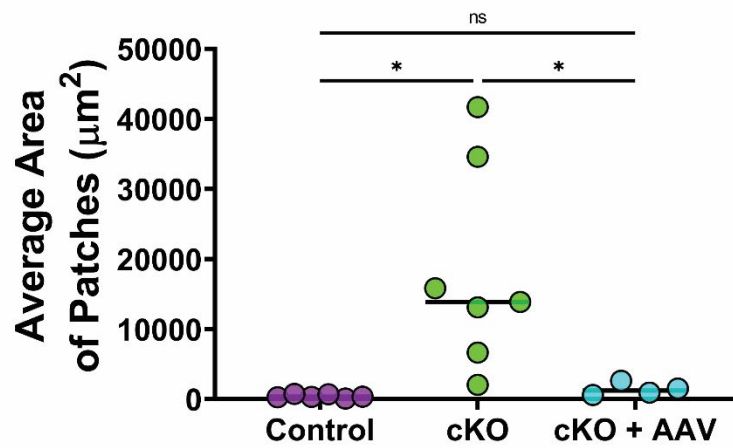

**Fig. S5. Administration of AAV2/9-MCK-Pomt1 to Pomt1 cKO mice restores matriglycan levels and improves cardiomyofiber protection against contraction-induced damage.** Pomt1 cKO mice were untreated or were injected with AAV2/9-MCK-Pomt1. **A**, Immunofluorescence of cardiac ventricles and tibialis anterior muscles to detect matriglycan (IIH6 antibody). Scale bar = 100  $\mu$ m. Control, Pomt1 cKO, and Pomt1 cKO + AAV2/9-MCK-Pomt1 mice received an injection of ISO (10 mg/kg body weight i.p.) and their hearts were harvested 24-h later. **B**, *Top*, immunofluorescence of intra-myofiber IgG. *Bottom*, quantification of the average size area of IgG-labeled myofiber patches in control, Pomt1 cKO mice, and Pomt1 cKO mice that received AAV2/9-MCK-Pomt1. Histopathology was performed in male and female mouse hearts (Control,  $n = 6$ ; Pomt1 cKO,  $n = 7$ ; Pomt1 cKO + AAV2/9-MCK-Pomt1,  $n = 4$ ). Statistical analyses were performed by unpaired t-test with Holm-Sidak post-hoc. Data expressed as mean  $\pm$  standard deviation. \*  $> 0.05$ .



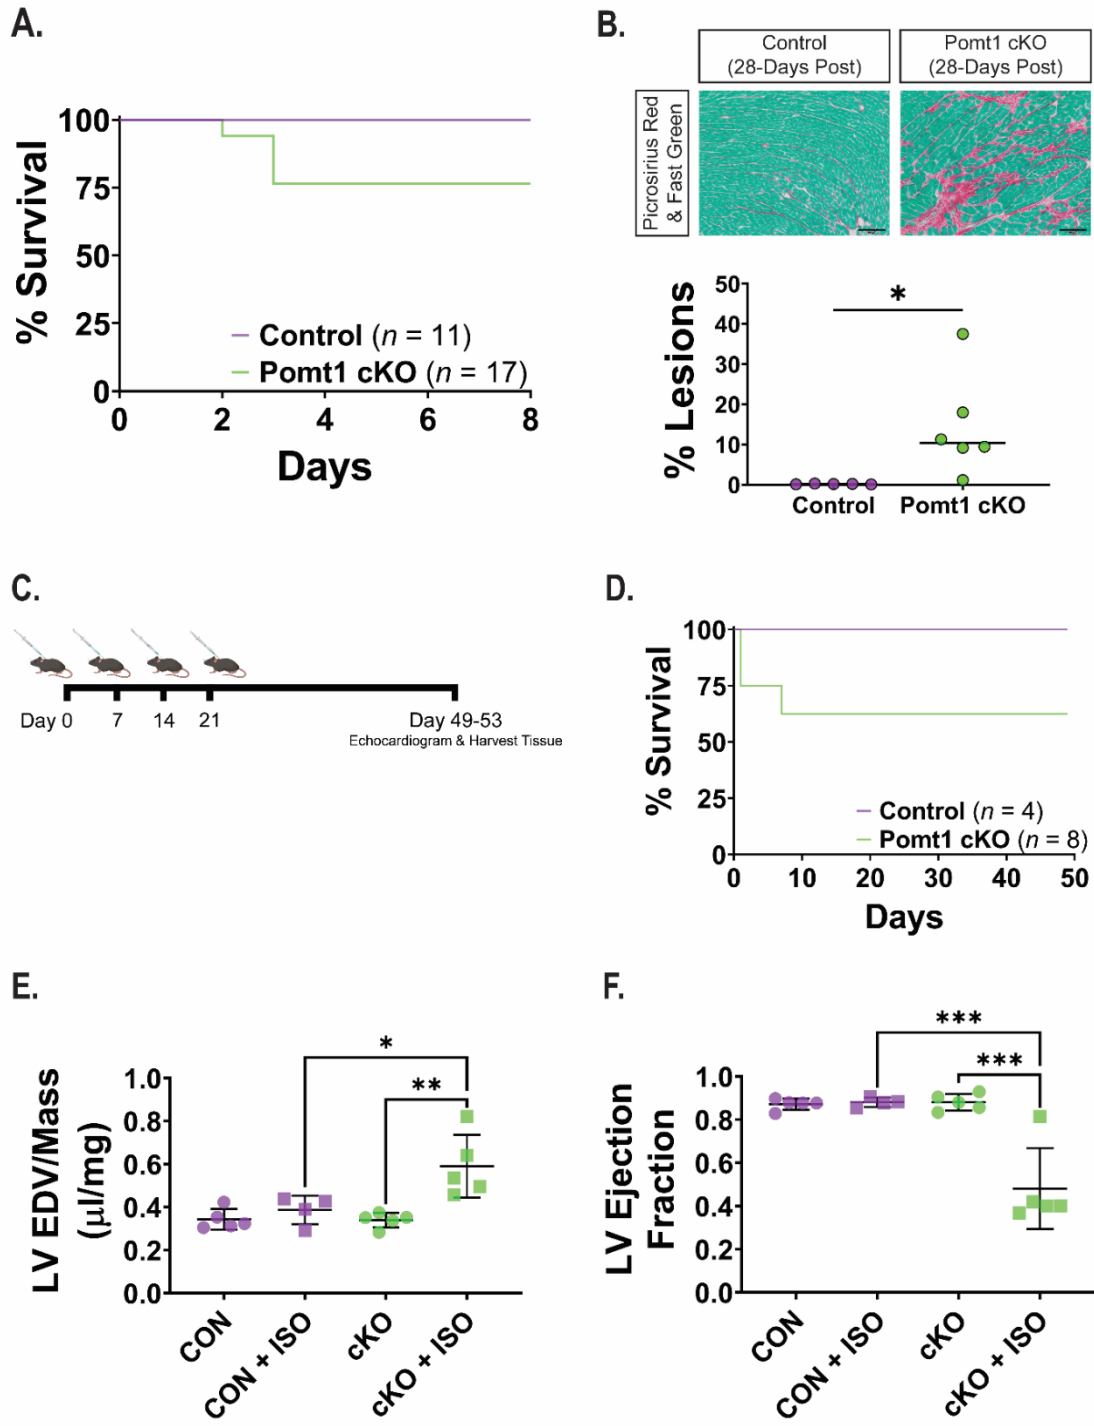

**Fig. S6. Catecholamine-induced stress promotes progressive cardiomyopathy in Pomt1 cKO hearts.** **A-B** Control and Pomt1 cKO mice were injected with a single bolus of ISO (10 mg/kg body weight). **A**, Kaplan-Meier survival curve of controls and Pomt1 cKO mice. Experiments were performed with mice of both sexes. Controls,  $n = 11$ ; Pomt1 cKO,  $n = 17$ . **B**, Histological analysis of cardiac tissues 28 days after injection. Cardiac sections were stained with Picosirius red and Fast Green. Scale = 100  $\mu\text{m}$ . Quantification of ventricular fibrosis of tissue stained with Picosirius red. Experiments were performed with mice of both sexes. Controls,  $n = 5$ ; Pomt1 cKO,  $n = 6$ . Statistical analyses were performed with unpaired t-test with Holm-Sidak post-hoc. Data expressed

as mean  $\pm$  standard deviation. \* = 0.03 **C**, Schematic of experimental design to provide repeated ISO injections once every seven days over a 28-day period in control and Pomt1 cKO mice. **D**, Kaplan-Meier survival curve of controls and Pomt1 cKO mice injected as in **C**. **E-F** Echocardiographic analysis to determine **E**, left ventricle (LV) end diastolic volume per mass (LV EDV/Mass) and **F**, LV ejection fraction in mice treated as in **C**. Controls,  $n = 4$ ; Controls + ISO,  $n = 4$ ; Pomt1 cKO,  $n = 5$ ; Pomt1 cKO + ISO,  $n = 5$  (began with  $n = 8$ ). Statistical analyses were performed with one-way ANOVA with Tukey's post-hoc. Data expressed as mean  $\pm$  standard deviation. \* = 0.02; \*\* = 0.002; \*\*\* <0.0001.

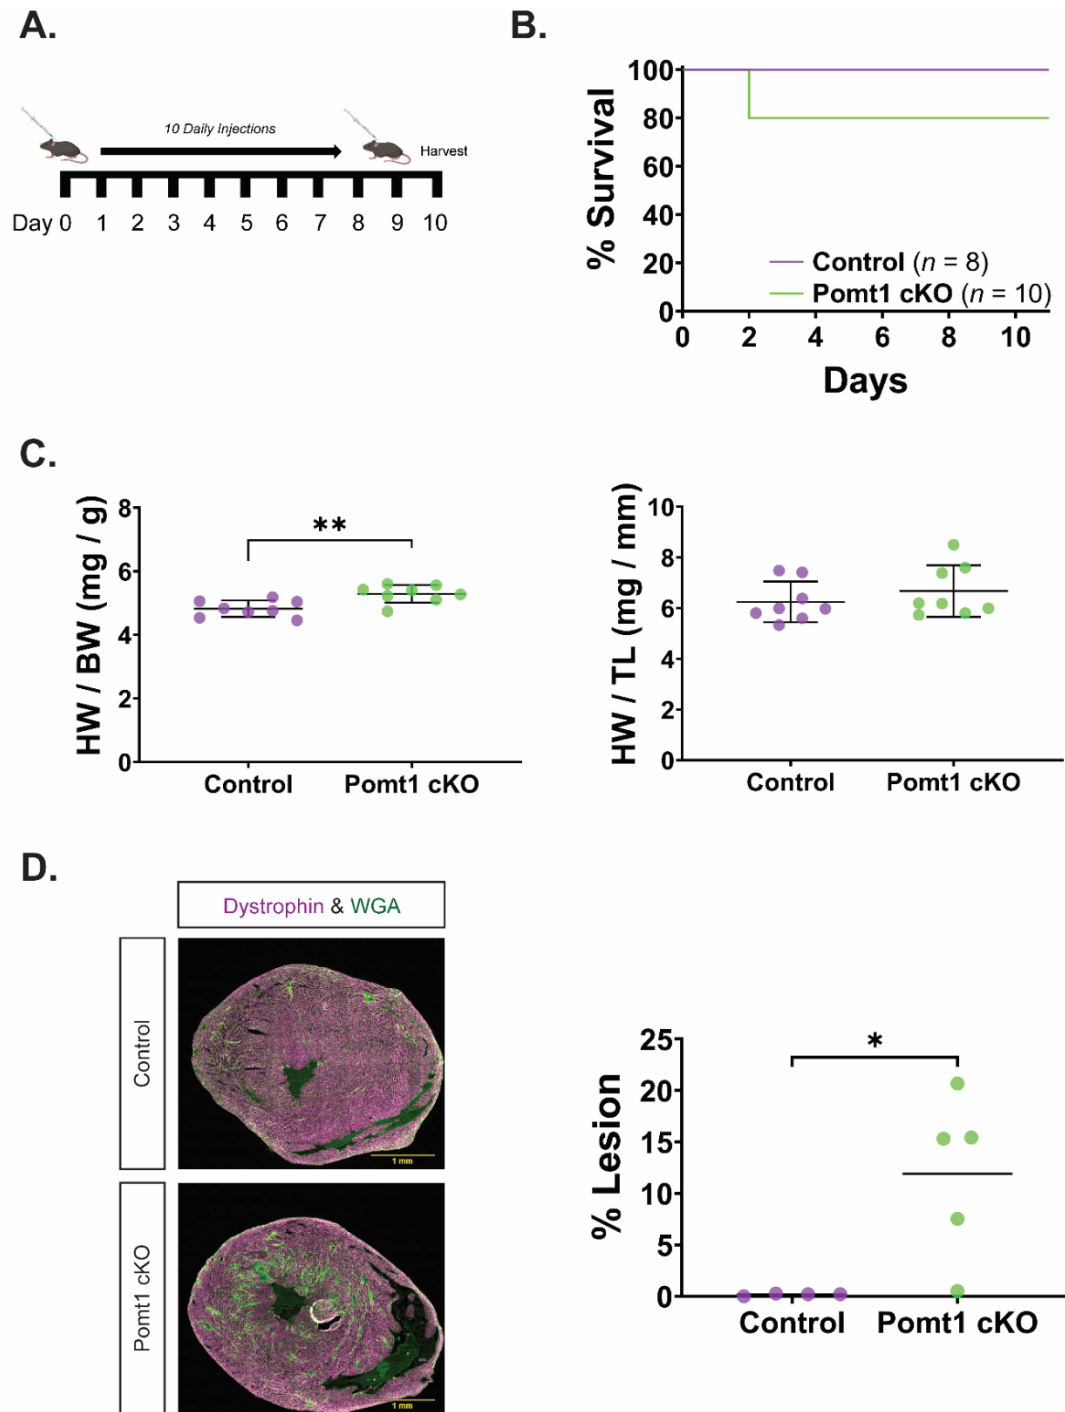

**Fig. S7. Daily, low dose  $\beta$ -adrenergic challenge leads to death and disrupts the ventricular morphology in Pomt1 cKO mice.** **A**, Schematic of experimental design. Control and Pomt1 cKO mice received repeated i.p. injections of ISO (2.5 mg/kg body weight). **B**, Kaplan-Meier survival curve of control and Pomt1 cKO mice treated as in **A**. (Controls,  $n = 8$ ; Pomt1 cKO,  $n = 10$ ). **C**, Heart weight normalized to body weight (*left panel*) and heart weight normalized to tibial length (*right panel*) of mice in **B**. \*\*,  $p = 0.0037$ , as determined by unpaired two-tailed t-test. **D**, Immunofluorescence on ventricular cross-sections from mice in **B**. WGA-488 (*green*) was used as a marker of the extracellular matrix and dystrophin (*purple*) was used as a myocyte membrane marker. Scale bar = 1 mm. Graph displays quantification of ventricular lesions. Experiments were

performed with mice of both sexes. Controls,  $n = 4$ ; Pomt1 cKO,  $n = 5$ . Statistical analyses were performed with unpaired t-test with Holm-Sidak post-hoc. Data expressed as mean  $\pm$  standard deviation. \*,  $p = 0.0222$ .

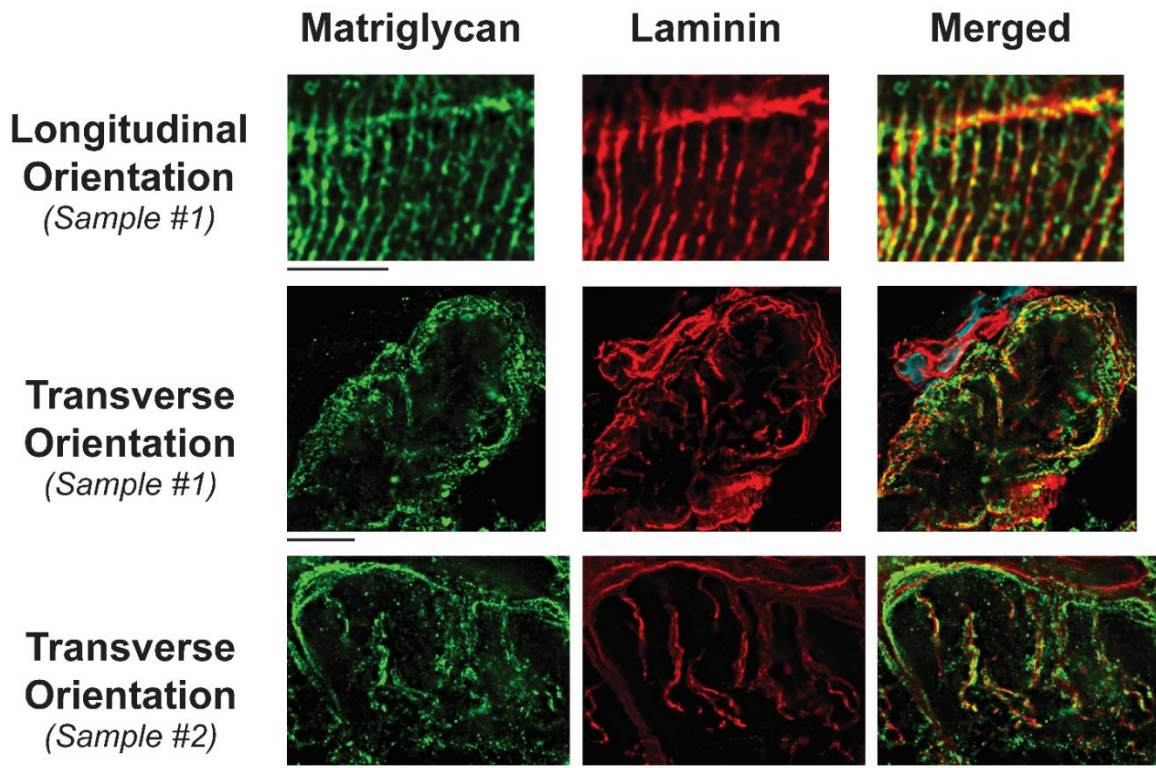

**Fig. S8. Presence of matriglycan in human cardiac muscle t-tubule membranes.** Immunofluorescence on frozen human heart cryosections to detect the presence of matriglycan and extracellular matrix laminin in cardiac muscle fibers. *Top row* shows matriglycan and laminin immunofluorescence in longitudinally oriented cardiac muscle fibers. Scale bar = 5  $\mu\text{m}$ . *Middle* and *bottom rows* show matriglycan and laminin immunofluorescence in transverse oriented cardiac muscle fibers. Scale bars = 10  $\mu\text{m}$ . Results were collected from two human heart samples.

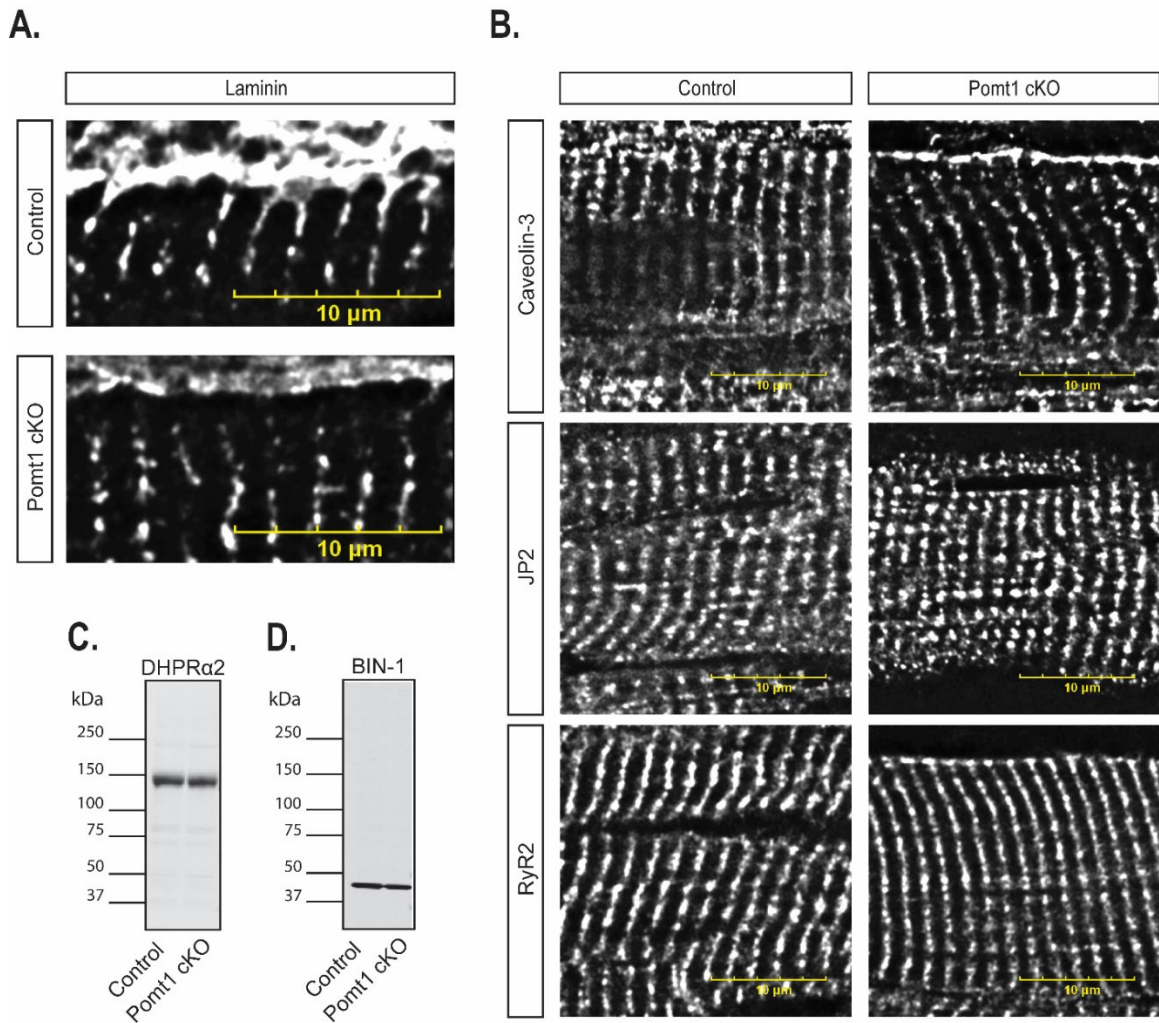

**Fig. S9. Development of the t-tubule network does not require O-mannosylated  $\alpha$ -DG.** **A-B** Immunofluorescence of cryosections of ventricles from control and Pomt1 cKO mice to detect basement membrane protein laminin **A**, membrane localized protein caveolin-3 **B**, and junctional dyad proteins junctophilin 2 (JP2) and ryanodine receptor 2 (RyR2). Scale bar = 10  $\mu$ m. **C-D** Immunoblot analysis of WGA-enriched control and Pomt1 cKO cardiac muscle t-tubule membrane proteins dihydropyridine receptor  $\alpha$ -2 (DHPR $\alpha$ 2; **C**) and BIN-1 **D**.

A.

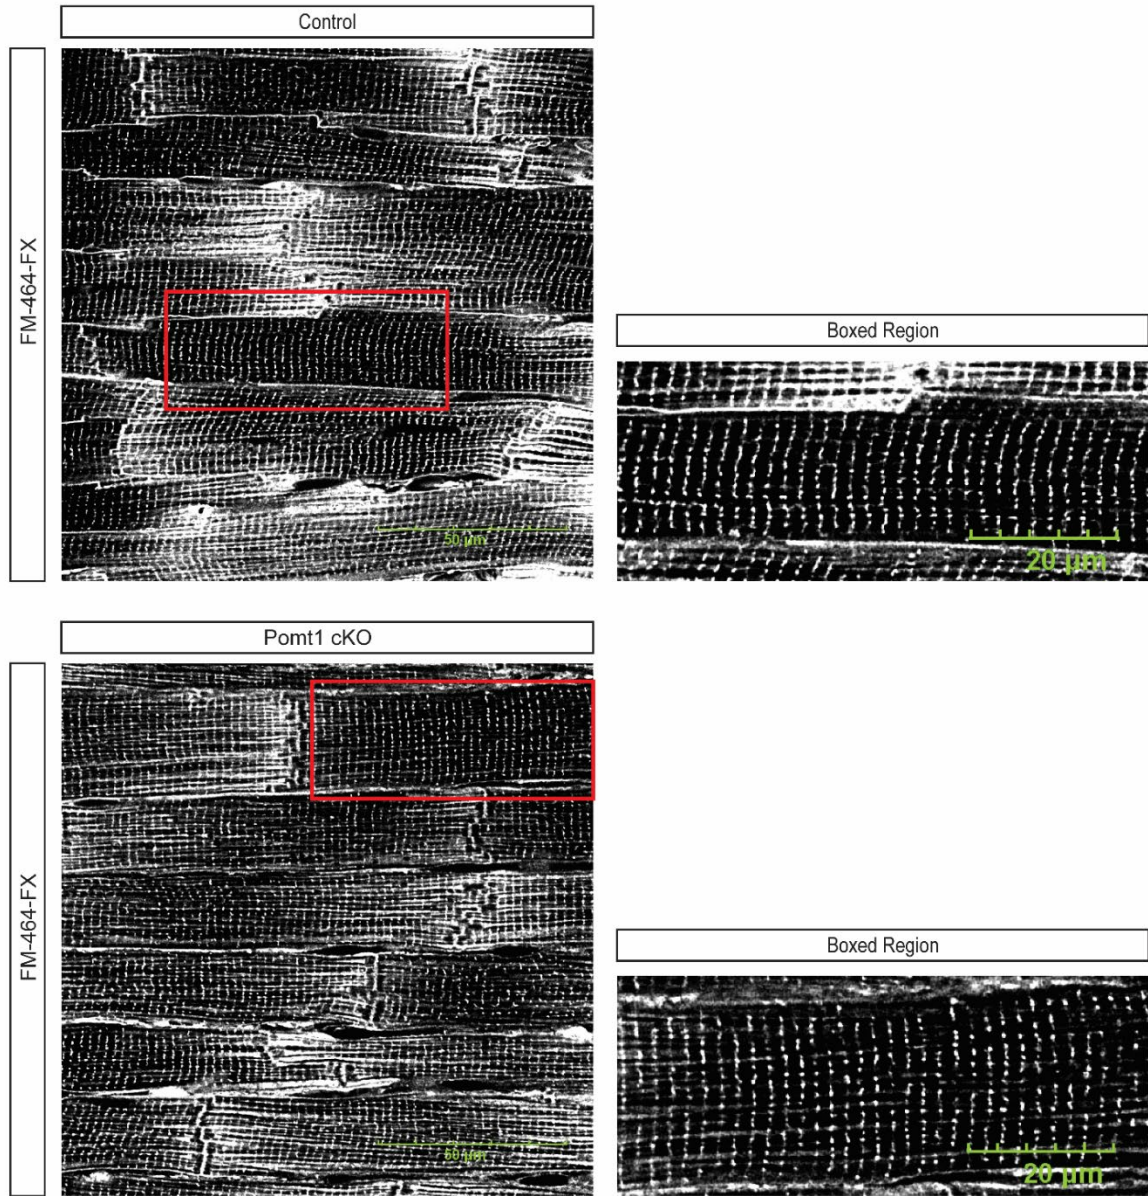

**Fig. S10.** FM 464-FX images shown on the left were captured at 90x magnification. Scale bar = 50 µm. Boxed regions (red rectangular box) highlight the region of the myocardium that is shown in the images on the right (as shown in Fig. 4C). Scale bar = 20 µm.

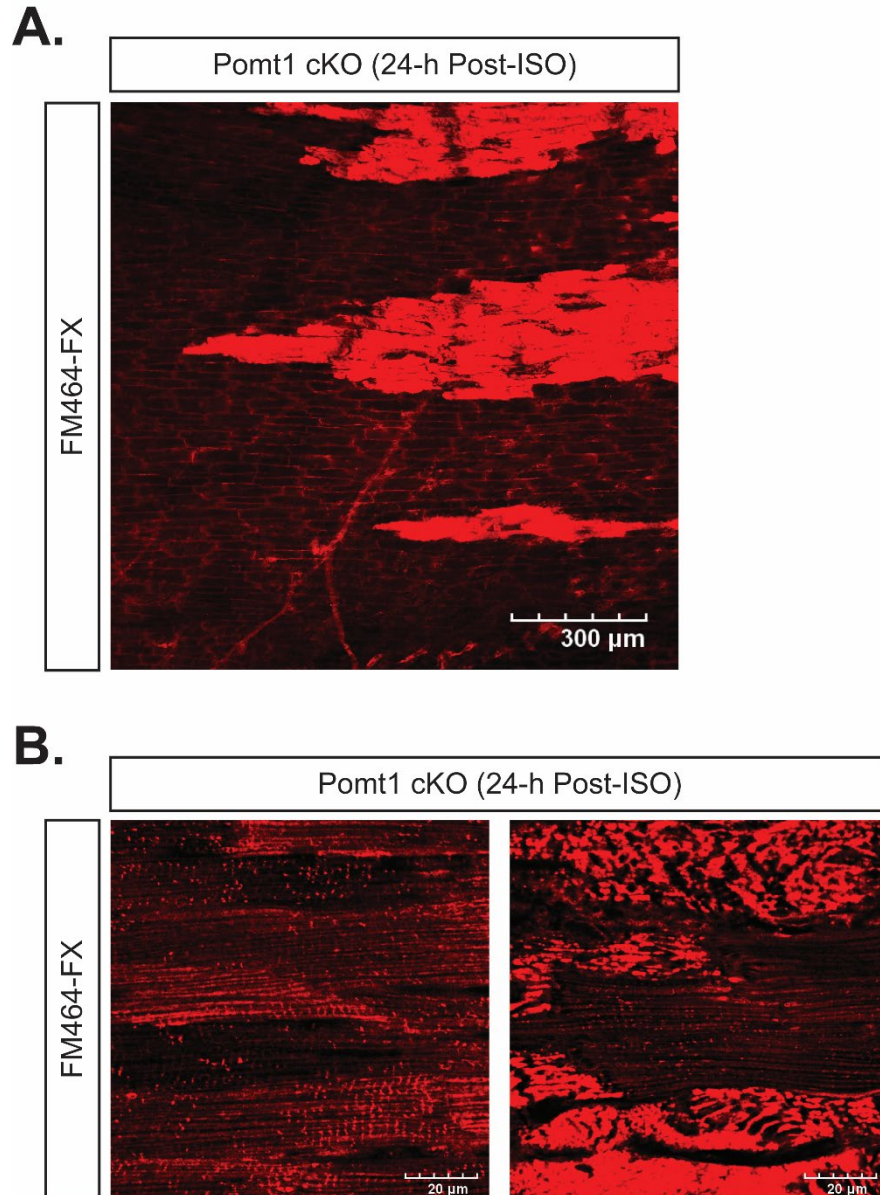

**Fig. S11. Lipophilic dye, FM464-FX, infiltrates myocytes that suffered catastrophic sarcolemma damage.** **A**, Low magnification (10x) examination identified regions of fibers that displayed myocyte uptake of FM464-FX, while many of the cardiac fibers were spared of catastrophic membrane damage in stressed Pomt1 cKO hearts. Scale bar = 300  $\mu\text{m}$ . **B**, Variations in myocyte damage are shown. *Left panel* displays cardiac fibers that did not accumulate intramyocyte FM464-FX but were susceptible to t-tubule disruption. *Right panel* shows cardiac fibers on the border of an ischemic region. Myocytes that were infiltrated with FM464-FX dye are intensely red, whereas fibers that avoided catastrophic membrane damage did not show myocyte infiltration of the dye.



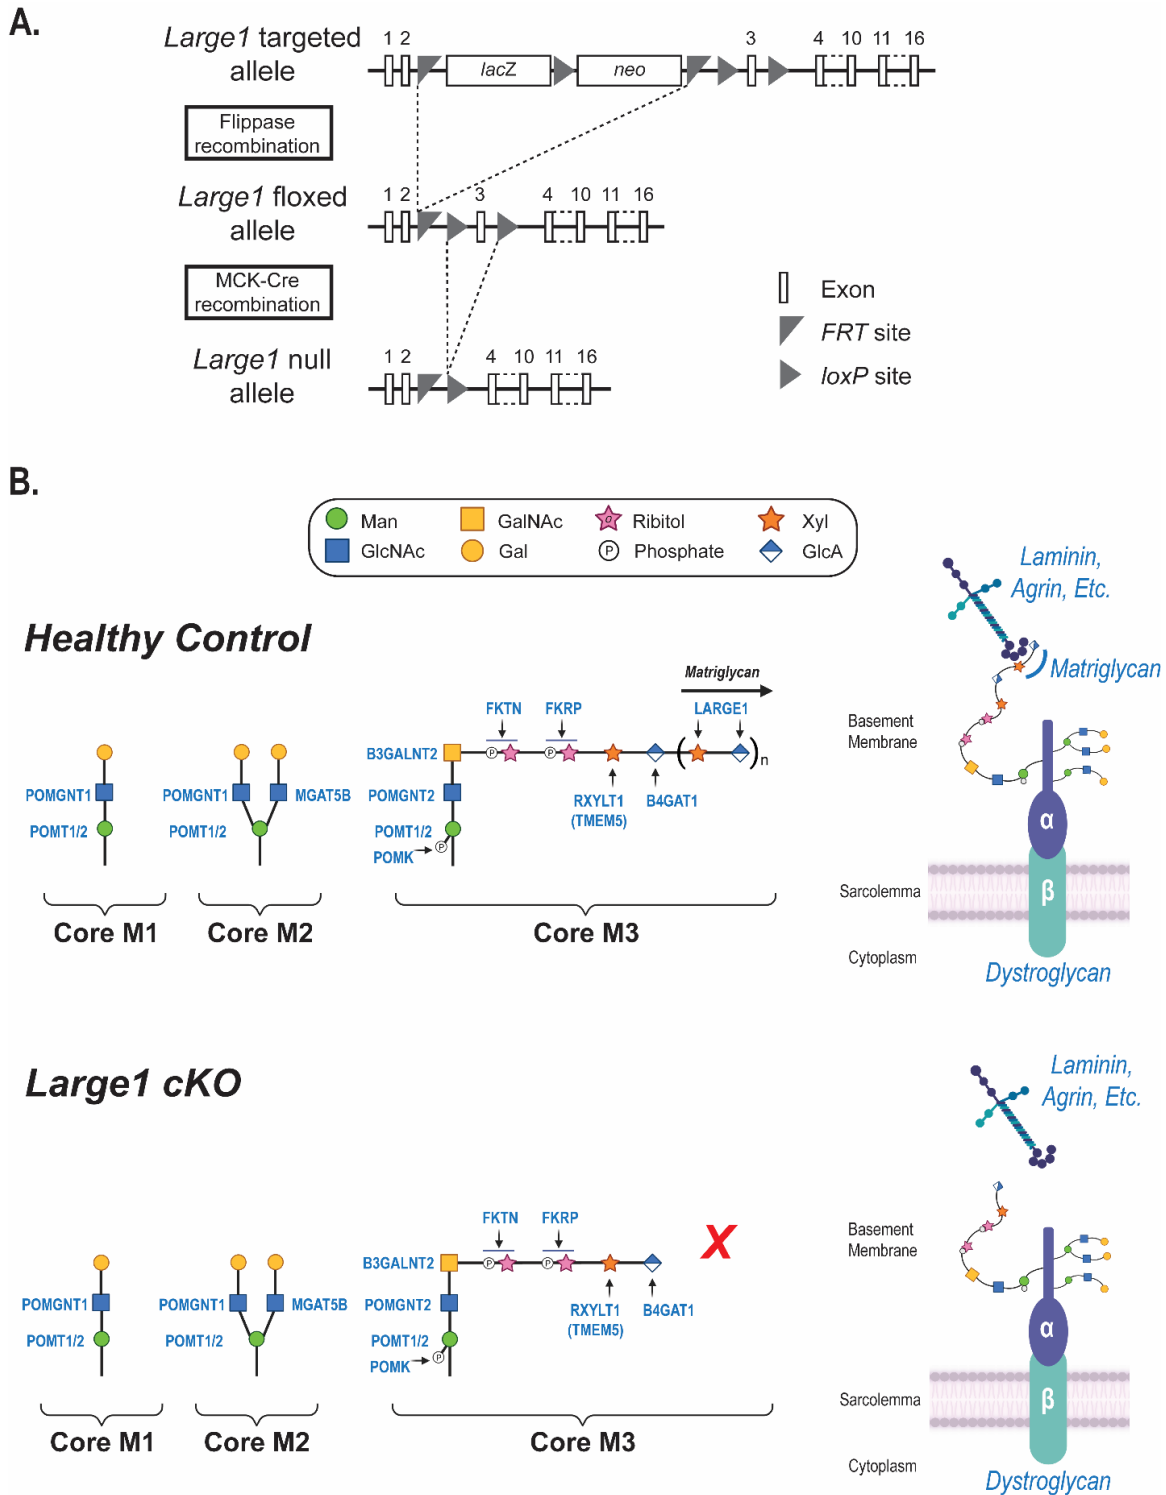

**Fig. S12. Generation of the MCK-Cre / floxed *Large1* mouse line.** **A**, Design of the floxed *Large1* mouse line crossed with Cre under the MCK promoter. **B**, Comparison of core M1, M2, and M3 biosynthesis in healthy control mice and *Large1* cKO mice. Panels on the right illustrate sarcolemma-localized dystroglycan and its interaction with ECM ligands. Abbreviations: man, mannose; GlcNAc, *N*-acetyl-glucosamine; Gal, galactose; GalNAc, *N*-acetyl-galactosamine; Xyl, xylose; GlcA, glucuronic acid; POMT1/2, protein O-mannosyltransferases 1 and 2; POMGNT1,

protein O-linked mannose *N*-acetyl-glucosaminyltransferase 1; POMGNT2, protein O-linked mannose *N*-acetyl-glucosaminyltransferase 2; MGAT5B, mannosyl  $\alpha$ 1,6-glycoprotein  $\beta$ 1,6-*N*-acetyl-glucosaminyltransferase; POMGNT2, protein O-linked mannose *N*-acetyl-glucosaminyltransferase 2; B3GALNT2,  $\beta$ 1,3-*N*-acetylgalactosaminyltransferase 2; POMK, protein O-mannose kinase; FKTN, Fukutin; FKRP, Fukutin related protein; RXYLT1, ribitol xylosyltransferase 1; TMEM5, transmembrane protein 5; B4GAT1,  $\beta$ 1,4-glucuronyltransferase 1; LARGE1, like-acetyl-glucosaminyltransferase 1.

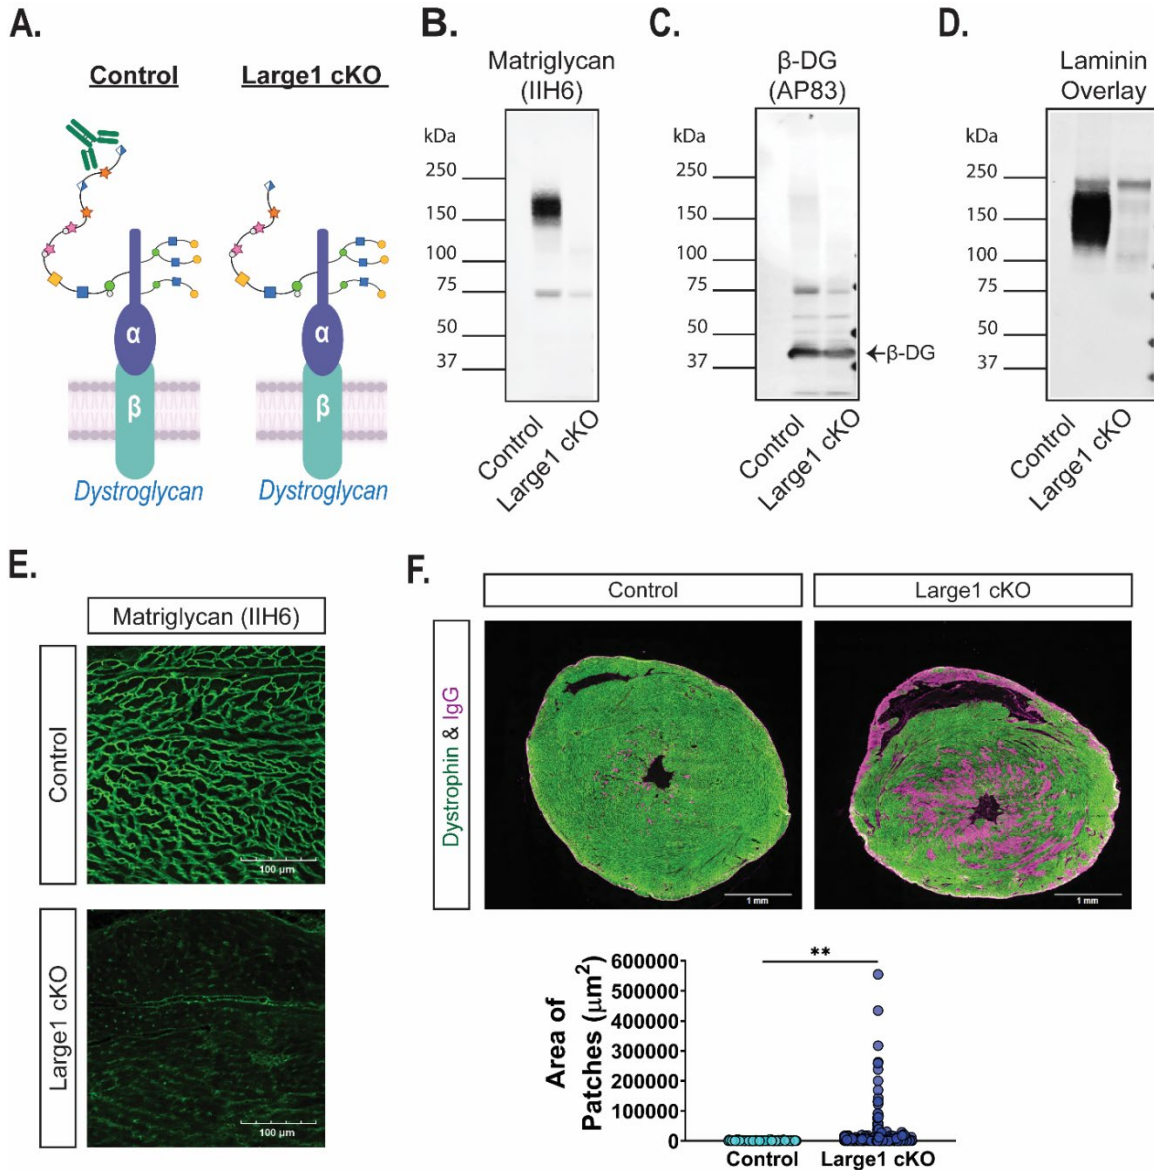

**Fig. S13. Cardiac muscle matriglycan is required to prevent stress-induced membrane damage.** **A**, DG core M glycans in control and Large1 cKO. **B-D** immunoblots of ventricle muscle to detect **B**, matriglycan; **C**, β-DG; and **D**, laminin binding. Experiments were performed on two samples per group. **E**, Immunofluorescence of ventricles to detect matriglycan ( $n = 3$  controls and  $n = 3$  Large1 cKO mice). Scale bar = 100 μm. Isoproterenol (ISO; 10 mg/kg body weight) was administered to promote an acute bout of increased cardiac workload. Mice were sacrificed 24-h post-injection. **F**, Ventricular cross-sections were used to assess cardiomyofiber damage as detected by intramyocyte IgG. Scale bar = 1 mm. Quantification of the area of individual patches of damaged fibers. Unpaired t-test with Holm-Sidak post-hoc were performed. Data expressed as mean ± standard deviation. \*\*  $p = 0.007$ .

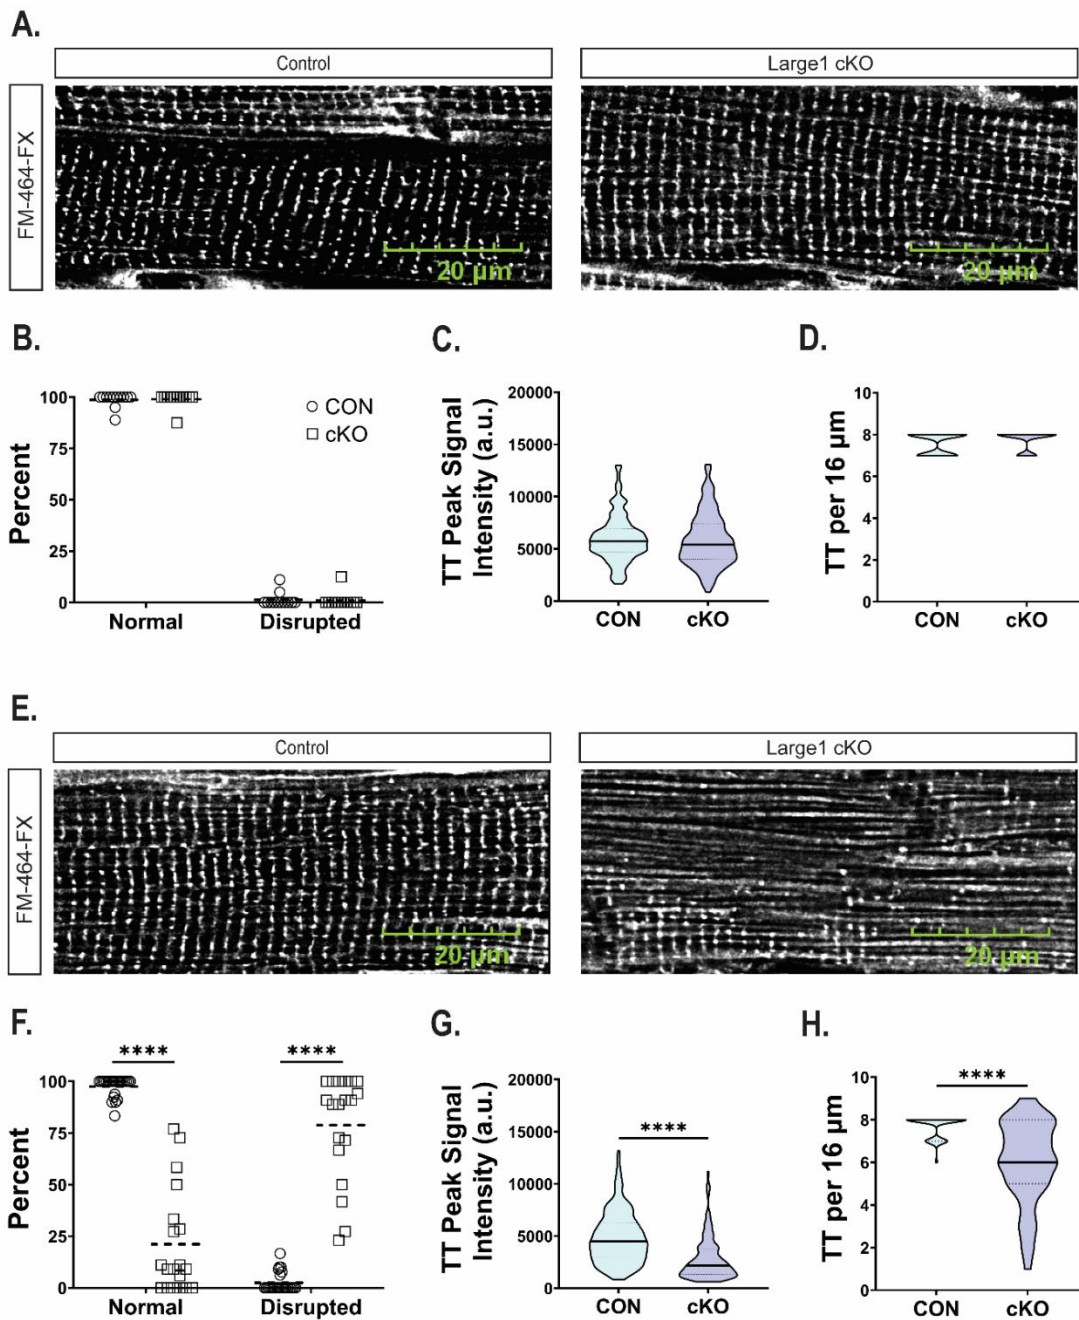

**Fig. S14. Cardiac muscle matriglycan is essential to prevent stress-induced t-tubule damage.** **A**, Labeling of control and Large1 cKO whole left ventricles stained with FM 464-FX under baseline conditions. Scale bar = 20  $\mu\text{m}$ . **B**, Percentage of myofibers that showed either normal or disrupted patterns of t-tubules. **C**, Line scan analysis to determine the peak signal intensity of FM 464-FX labeled t-tubules (TT). **D**, Number of t-tubules observed within a 16  $\mu\text{m}$  regions. Image analysis was performed on hearts of mice from both sexes. Unpaired t-test with Holm-Sidak post-hoc were performed. Data expressed as mean  $\pm$  standard deviation. **E**, Labeling of control and Large1 cKO whole left ventricle stained with FM 464-FX 24-h after ISO challenge. **F-H**, Quantification as performed in **B-C**. Image analysis was performed on hearts from both sexes. Unpaired t-test with Holm-Sidak post-hoc were performed. Data expressed as mean  $\pm$  standard deviation. \*\*\*\*  $p = 0.0001$ .
